# Supplementary material
Source: Research Square preprint supplement (doi:10.21203/rs.3.rs-8696636/v1)
Supplement: Supplementary file 1 [file 94a674c741ac02eb1006b22c.docx]

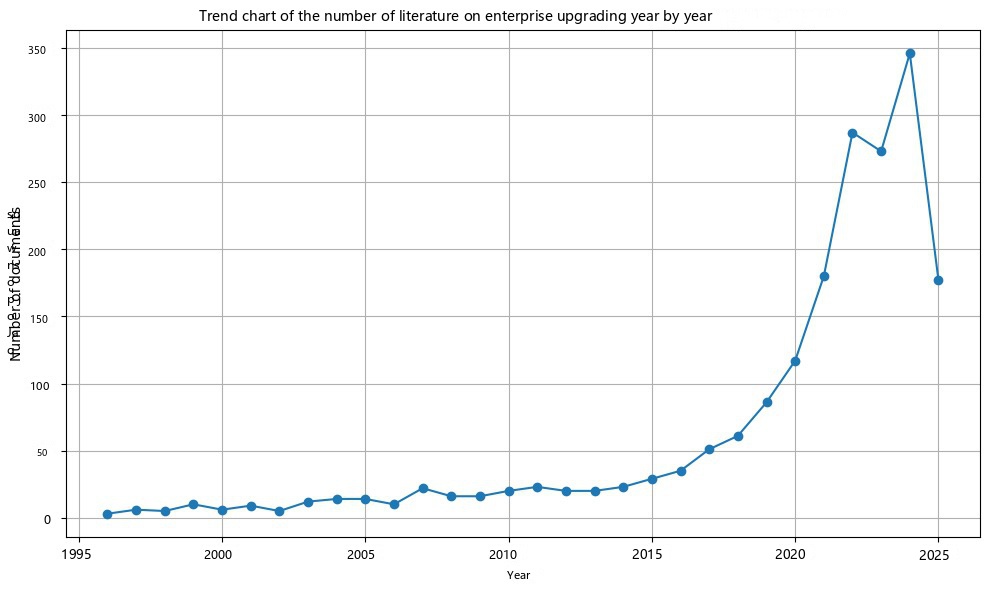


Figure 1: Number of documents published by enterprise upgrades

| **Serial number** | **Keywords** | **Frequency × Betweenness Centrality** |
| --- | --- | --- |
| 1 | green innovation | 187 |
| 2 | total factor productivity | 186 |
| 3 | digital transformation | 165 |
| 4 | innovation | 163 |
| 5 | multidisciplinary sciences | 91 |
| 6 | technology | 85 |
| 7 | energy & fuels | 81 |
| 8 | computer science, information systems | 74 |
| 9 | model | 72 |
| 10 | business, finance | 69 |

Table 1 Statistics of high-frequency keywords (TOP10) in literature


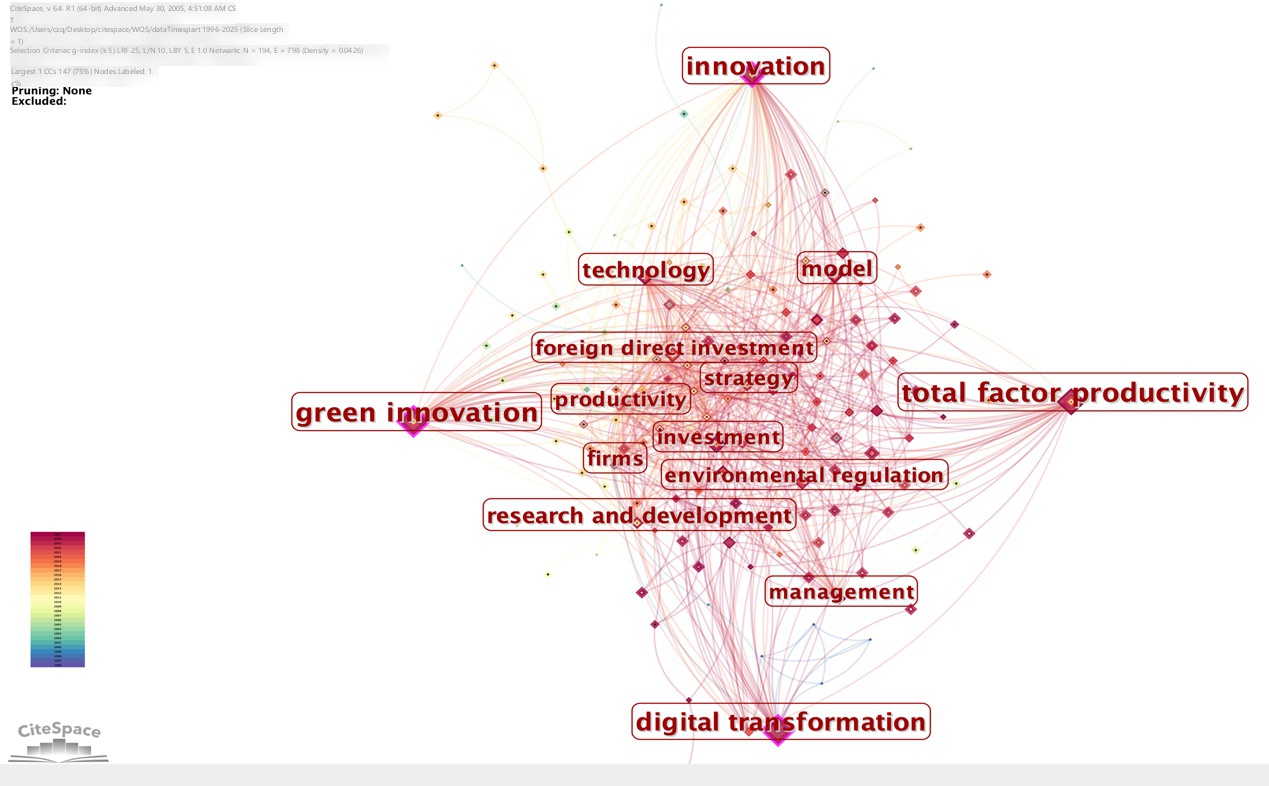


Figure 2 Study co-occurrence


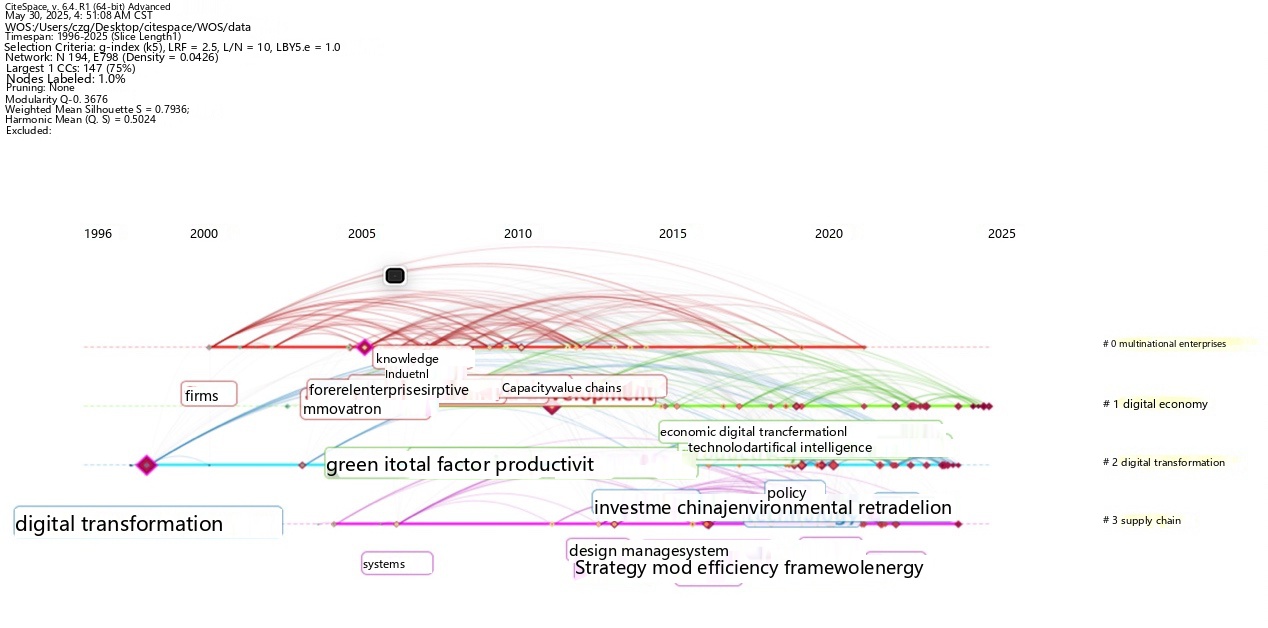


Fig3 Research timeline

| **Category** | **Variable** | **Symbol** | **Definition、Measurement** | **Primary data source** |
| --- | --- | --- | --- | --- |
| Dependent variable | Enterprise upgrading | **EU** | Coupling–coordination degree constructed from **GT**, **DT**, and **TFP** (details in Section 3.1.3). | Constructed by authors |
| EU component | Green transformation | **GT** | Number of **granted green patents** | SIPO、Global patent database |
| EU component | Digital transformation | **DT** | Text-based index from firms’ **annual reports** using a dictionary of digital keywords. | Annual reports |
| EU component | Total factor productivity | **TFP** | Firm-level TFP estimated by the **Levinsohn–Petrin (LP)** method. | WIND、CSMAR |
| DID core | Post-policy period | **Post** | Dummy = 1 for years **≥ 2018**, 0 otherwise. | Policy timing |
| DID core | Treated firm | **Treat** | Dummy = 1 if pre-policy “digital exposure to Thailand” is high. | Customs |
| DID core | DID term | **Post×Treat** | Interaction term capturing the policy effect. | Constructed by authors |
| Controls | Firm age | **AGE** | Years since establishment | CSMAR |
| Controls | Firm size | **SIZE** | Firm size | WIND、CSMAR |
| Controls | Ownership | **OWN** | Dummy = 1 for SOE/central SOE, 0 otherwise. | CSMAR |
| Controls | Innovation | **INNO** | Innovation intensity . | CSMAR |
| Controls | Profitability | **ROA** | Return on assets = net profit、total assets. | WIND、CSMAR |
| Controls | Market position | **MS** | Market share. | WIND、CSMAR |
| Controls | Environmental legislation | **ENV_LAW** | Region-year environmental regulation stringency index | regional statistics |
| Controls | Environmental enforcement | **ENV_ENF** | Region-year enforcement intensity | regional statistics |

Table 2 summarizes the definitions and data sources of all variables used in the analysis. This study next describe the construction of the enterprise-upgrading index (EU), which integrates green transformation, digital transformation, and productivity.

Table 2 Variable definitions and data sources

Table 3 Enterprise Upgrading Index System

| Dimensions | Indicator Description | References |
| --- | --- | --- |
| Green transformation of enterprises | Measured by the number of green patents granted by enterprises | Guo et al.(2024),Niu et al. (2022),Lu et al. (2022),Wang et al. (2024),Shanyong et al. (2020),Ge et al. (2023) |
| Enterprise Digital Transformation | Using text mining methods, constructing a dictionary of enterprise digital transformation to measure | Zhang et al. (2022),Li et al. (2022),Cherepanov et al. (2022),Luo et al. (2023),Zhao et al. (2023),Chen et al. (2024) |
| Total factor productivity of enterprises | Using LP method to measure | Ren et al. (2023),Ai et al. (2020),Pan et al. (2021),Liu et al. (2023),Wu et al. (2023),Teng et al. (2024) |

Table 3 Enterprise Upgrading Index System


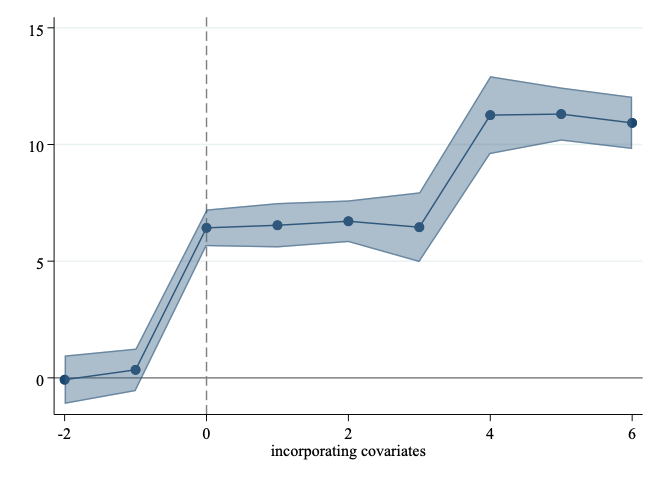


Figure 4 Parallel trend test

| variable | Explained variable: Enterprise upgrading | | | |
| --- | --- | --- | --- | --- |
| （1） | （2） | （3） | (4) |
| Post×Treat | 0.0519*** | 0.0536*** | 0.0774*** | 0.0697*** |
| [3.9329] | [3.7318] | [4.6583] | [3.7410] |
| Control variables | NO | NO | YES | YES |
| Firm fixed effects | YES | YES | YES | YES |
| Time fixed effects | NO | YES | NO | YES |

Note: *, **, *** represent the significance levels of 10%, 5% and 1% respectively, and the numbers in parentheses represent t values.

Table 4 Benchmark regression results


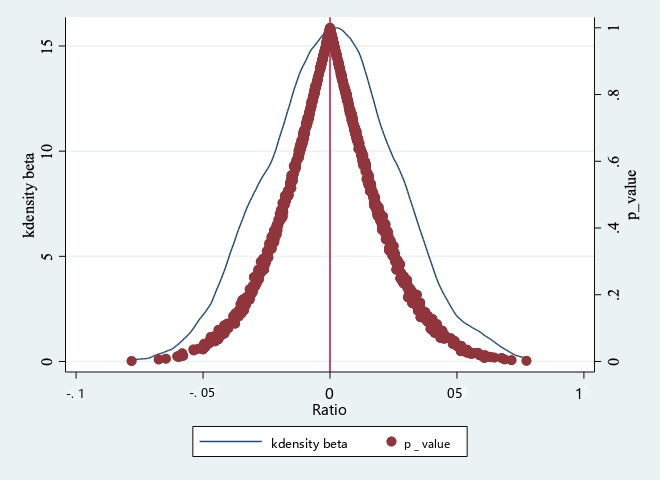


Figure 5 Placebo test

| **variable** | **(1) Export≥12%** | **(2) Export≥15%** | **(3) Orders Top20%** | **(4) Revenue≥8%** |
| --- | --- | --- | --- | --- |
| Post×Treat | 0.0621*** | 0.0657*** | 0.0647*** | 0.0718*** |
| [3.3147] | [3.9258] | [5.2178] | [4.2681] |
| Control variables | Yes | Yes | Yes | Yes |
| Firm fixed effects | Yes | Yes | Yes | Yes |
| Time fixed effects | Yes | Yes | Yes | Yes |

Table 5 Robustness: Tightened Treatment Thresholds

| **Variable** | **(1) Z = DigCap** | **(2) Z = SOE** |
| --- | --- | --- |
| Post × Treat | 0.0201*** | 0.3579*** |
|  | [4.4821] | [3.2161] |
| Post × Treat × Z | 0.0574*** | 0.0726*** |
|  | [4.1258] | [3.2169] |
| Post × Z | 0.0261*** | 0.0409*** |
|  | [5.0597] | [3.9754] |
| Controls | Yes | Yes |
| Firm FE | Yes | Yes |
| Year FE | Yes | Yes |

Table 6 Heterogeneity analysis 1

| **Variable** | **(1) Z = HighCarbon** | **(2) Z = HighSkill** |
| --- | --- | --- |
| Post × Treat | 0.0212*** | 0.0154*** |
|  | [3.1257] | [3.4269] |
| Post × Treat × Z | 0.0749*** | 0.0825*** |
|  | [4.9625] | [4.5187] |
| Post × Z | 0.0142*** | 0.0291*** |
|  | [3.4951] | [4.0684] |
| Controls | Yes | Yes |
| Firm FE | Yes | Yes |
| Year FE | Yes | Yes |

Table 7 Heterogeneity analysis 2
